# Supplementary material for: Effects of onabotulinumtoxinA treatment for chronic migraine on common comorbidities including depression and anxiety
Source: PubMed Central journal article supplement — J Neurol Neurosurg Psychiatry. 2019 Jan 10;90(3):353–60. doi: 10.1136/jnnp-2018-319290 (PMC6518474; doi:10.1136/jnnp-2018-319290), 2019-01-10
Supplement: jnnp-2018-319290supp001.pdf [file jnnp-2018-319290supp001.pdf]

## Supplementary Material

**Supplementary Figure 1.** Change in (A) PHQ-9 scores and (B) GAD-7 scores in the analysis population after treatment with onabotulinumtoxinA; per protocol analysis using last observation carried forward for missing data.

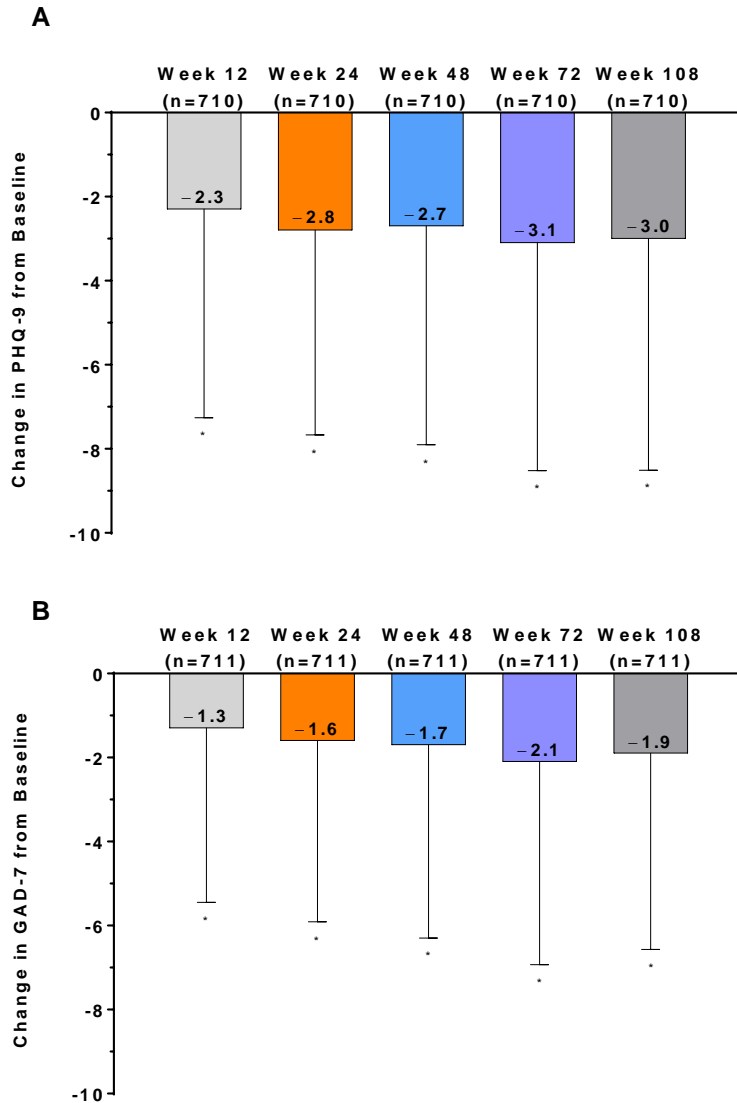

\* $P < 0.0001$  compared with baseline.

GAD-7=7-item Generalized Anxiety Disorder scale; PHQ-9=9-item Patient Health Questionnaire.

**Supplementary Figure 2.** The Percentages of Patients Experiencing a Reduction of  $\geq 1$  Severity Category for (A) PHQ-9 and (B) GAD-7 in the Analysis Population After Treatment With OnabotulinumtoxinA

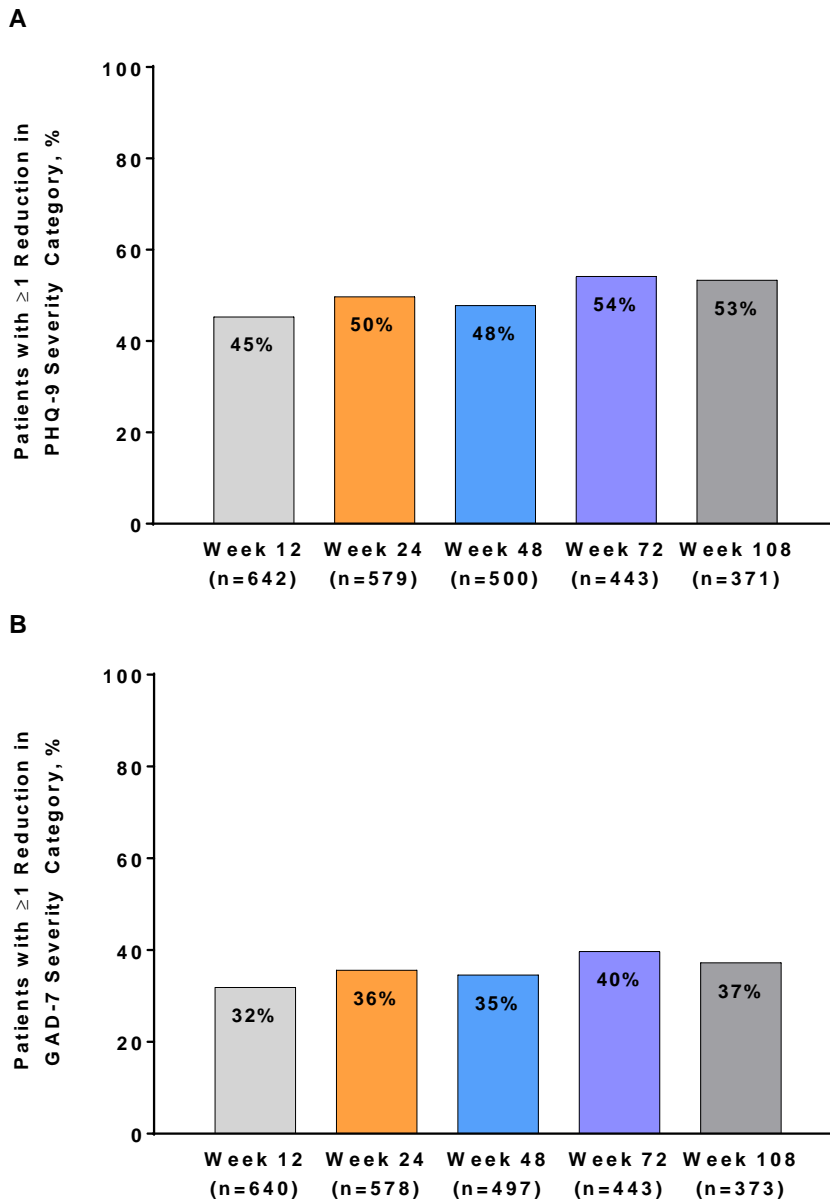

GAD-7=7-item Generalized Anxiety Disorder scale; PHQ-9=9-item Patient Health Questionnaire.

**Supplementary Figure 3.** Change in PHQ-9 scores from baseline based on observed data for patients with (A) mild, (B) moderate, (C) moderately severe, and (D) severe symptoms of depression at baseline.

**A**

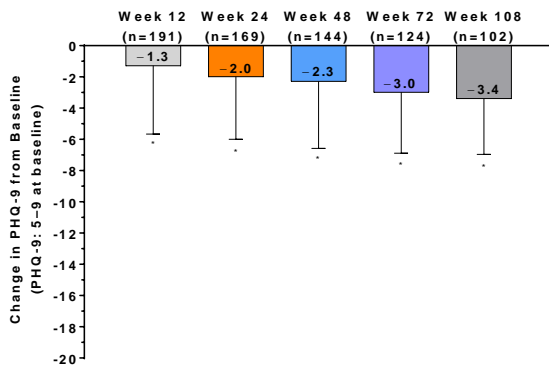

**B**

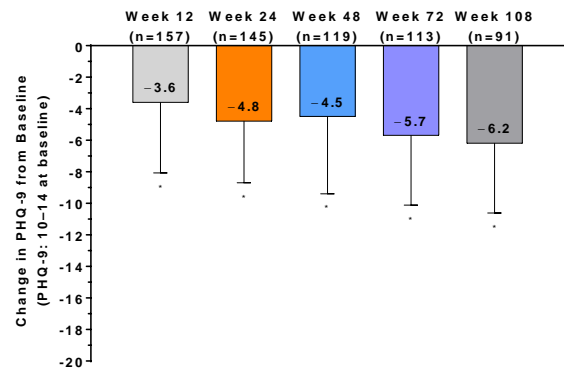

**C**

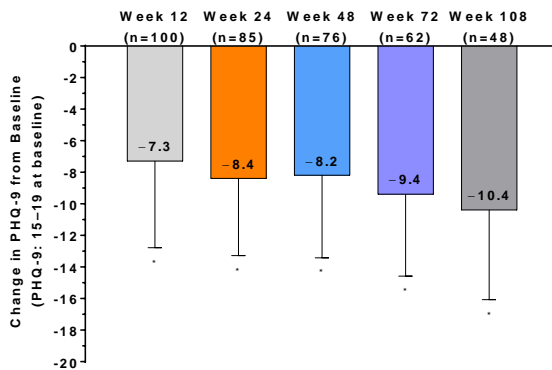

**D**

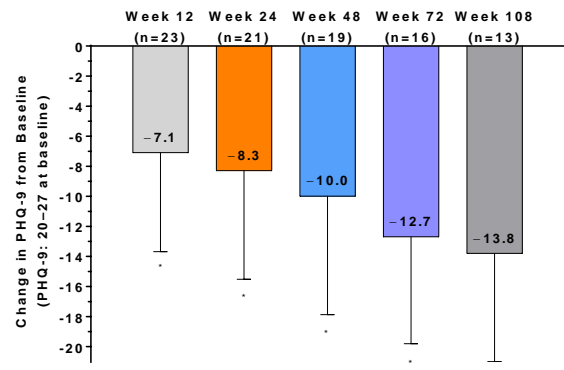

PHQ-9=9-item Patient Health Questionnaire.

\*Indicates  $P < 0.0001$  versus baseline.

**Supplementary Figure 4.** Change in GAD-7 scores from baseline based on observed data for patients with (A) mild, (B) moderate, and (C) severe symptoms of anxiety at baseline.

**A**

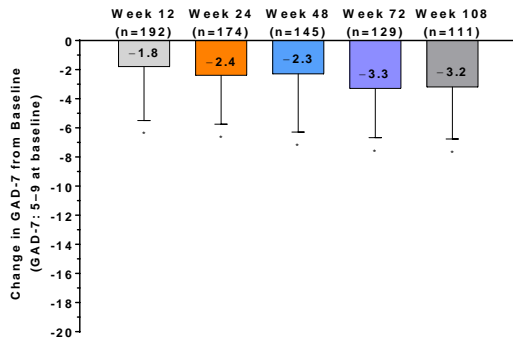

**B**

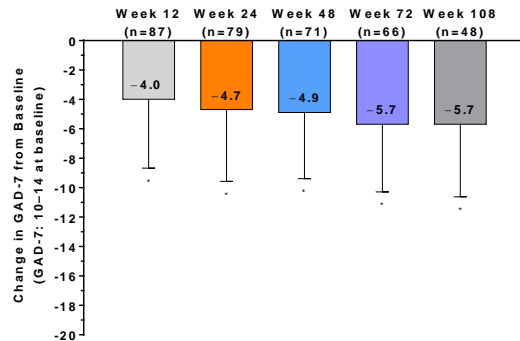

**C**

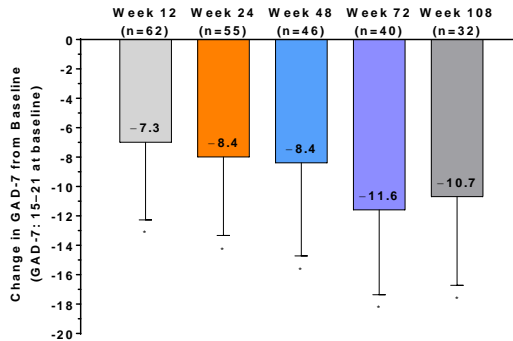

GAD-7=7-item Generalized Anxiety Disorder scale.

\*Indicates  $P < 0.0001$  versus baseline.
